# Supplementary material
Source: publisher figshare collection journal article supplement (https://acs.figshare.com/ndownloader/files/3624084)
Supplement: Supplementary file 1 [file 3624084]

## Unexpected trypsin cleavage at ubiquitinated lysines

Meghan C. Burke<sup>1</sup>, Yan Wang<sup>2</sup>, Amanda E. Lee<sup>1</sup>, Emma Kimm Dixon<sup>1</sup>, Carlos A. Castaneda<sup>1</sup>,  
David Fushman<sup>1</sup> and Catherine Fenselau<sup>1\*</sup>

<sup>1</sup>Department of Chemistry & Biochemistry, University of Maryland, College Park MD 20742

<sup>2</sup>Proteomics Core Facility, University of Maryland, College Park MD 20742

Supplementary information

A)

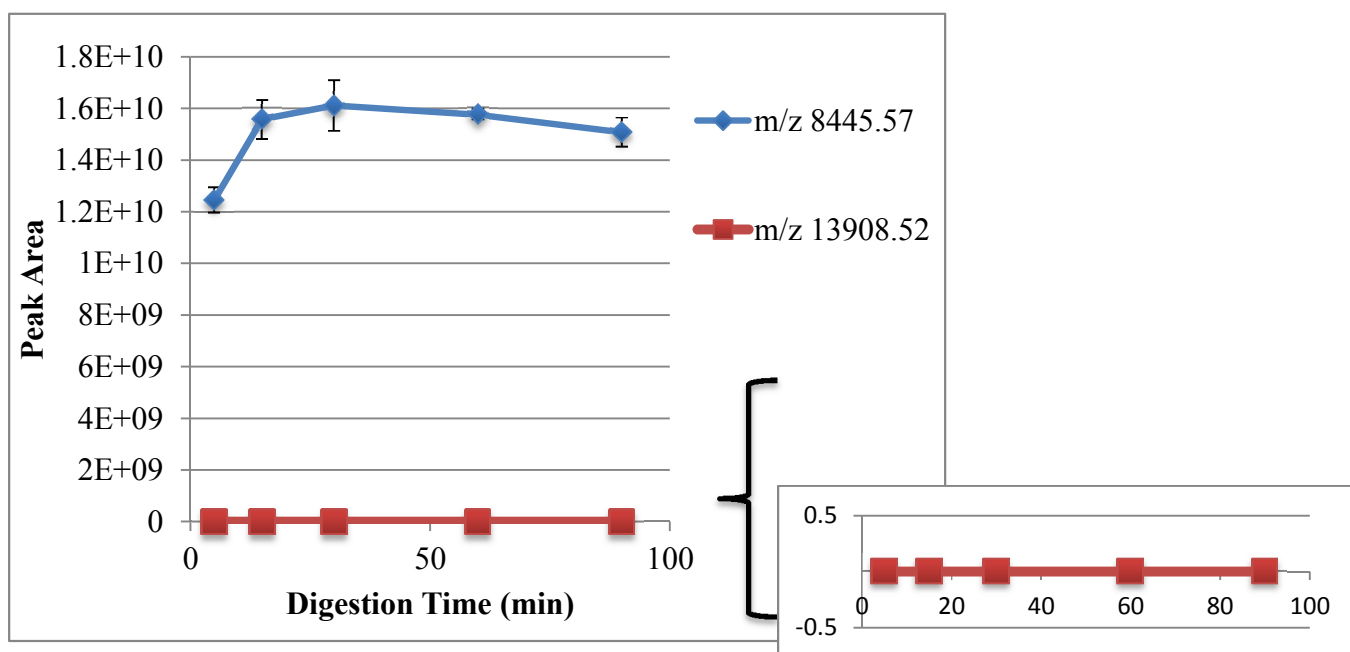

B)

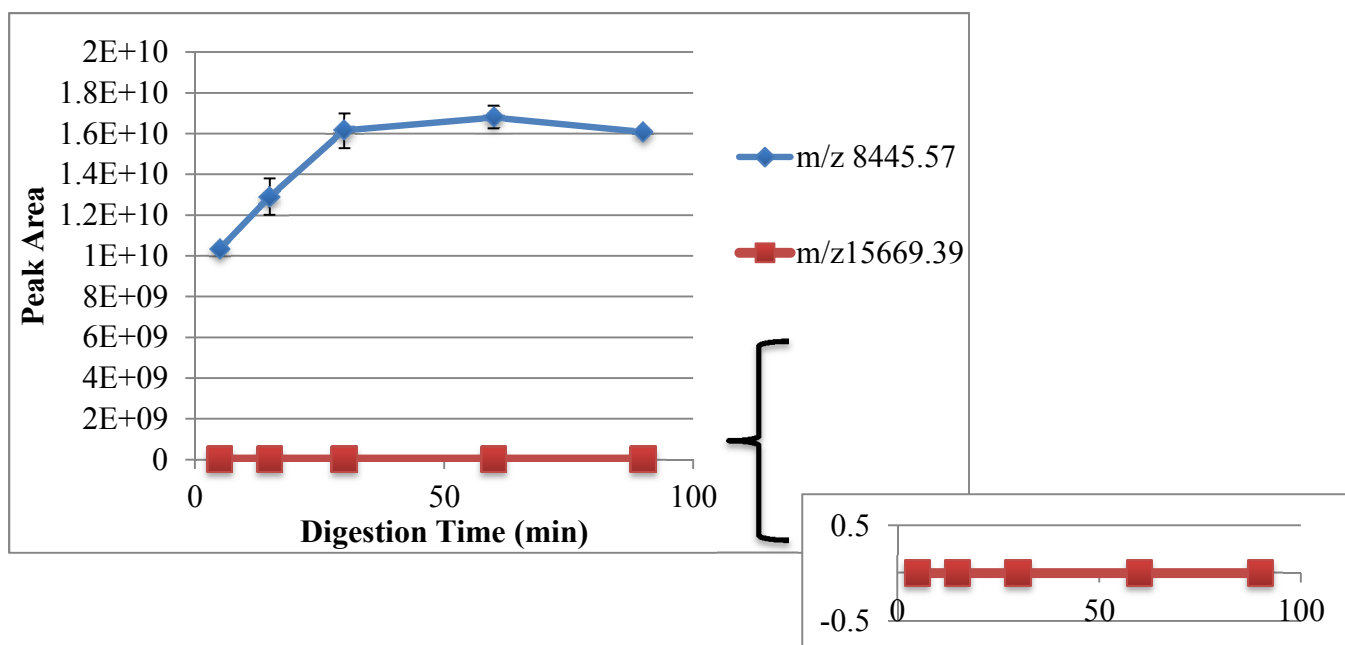

Supplemental Figure 1: Peak area as a function of time for the digestion of (A) Ub-<sup>48</sup>Ub and (b) Ub-<sup>63</sup>Ub. In (A) the ions monitored are 8445.57 Da: peptide [1-74] formed by cleavage at Arg74 in the distal ubiquitin; 13908.52 Da: the branched peptide formed by cleavage at Lys48 in the proximal chain of the intact dimer. In (B) the ions monitored are 8445.57 Da: peptide [1-74] formed by cleavage at Arg74 in the distal ubiquitin; 15669.39 Da: the branched peptide formed by cleavage at Lys63 in the proximal chain of the intact dimer. Standard deviations are shown for n=3.
